# Supplementary material for: Ascites-Derived Organoids to Depict Platinum Resistance in Gynaecological Serous Carcinomas
Source: Int J Mol Sci. 2023 Aug 25;24(17):13208. doi: 10.3390/ijms241713208 (PMC10487816; doi:10.3390/ijms241713208)

## SUPPLEMENTARY TABLES

**Supplementary Table S1. Standard Organoid Medium [10] recipe (for a total of 50 mL)**

| Compound                | Supplier                            | Volume Added (mL) | Stock Concentration | Final Concentration |
|-------------------------|-------------------------------------|-------------------|---------------------|---------------------|
| <b>DMEM/F12</b>         | Merck Millipore (D8437)             | 46.737            | -                   | -                   |
| <b>B27</b>              | Thermo Fisher Scientific (15360284) | 1000              | 50X                 | 1X                  |
| <b>Anti/anti</b>        | Thermo Fisher Scientific (15240062) | 500               | 100X                | 1X                  |
| <b>N2</b>               | Thermo Fisher Scientific (17502001) | 500               | 100X                | 1X                  |
| <b>Glutamax</b>         | Thermo Fisher Scientific (35050061) | 500               | 100X                | 1X                  |
| <b>ITS</b>              | Thermo Fisher Scientific (41400045) | 500               | 100X                | 1X                  |
| <b>N-acetylcysteine</b> | Sigma-Aldrich (A7250)               | 101               | 613 nM              | 1.24 nM             |
| <b>Noggin</b>           | Vitro (SIB-10267-H08H-1)            | 55                | 100 µg/mL           | 0.11 µg/mL          |
| <b>Rspo1</b>            | Thermo Fisher Scientific (17189851) | 55                | 200 µg/mL           | 0.22 µg/mL          |
| <b>SB 2021190</b>       | Thermo Fisher Scientific (J60950MF) | 16.6              | 20 mM               | 6.64 µM             |
| <b>Nicotinamide</b>     | Sigma-Aldrich (72340)               | 12.4              | 8 M                 | 1.98 mM             |

|                    |                              |      |            |            |
|--------------------|------------------------------|------|------------|------------|
| <b>b-Estradiol</b> | Sigma-Aldrich<br>(E2257)     | 2    | 25 µM      | 1 nM       |
| <b>EGF</b>         | PeproTech<br>(AF-100-15)     | 2.5  | 1000 µg/mL | 0.05 µg/mL |
| <b>FGF</b>         | PeproTech<br>(100-18B)       | 1    | 100 µg/mL  | 2 ng/mL    |
| <b>A83</b>         | Sigma-Aldrich<br>(SML0788)   | 1    | 23.72 mM   | 474.4 nM   |
| <b>Y27632</b>      | MedChemExpress<br>(HY-10583) | 16.6 | 10 mM      | 3.32 nM    |

**Supplementary Table S2. Overview of Immunofluorescent Profiling of Patient Derived Organoids**

| Sample Code | PAX8             | EpCAM | Vimentin | Mesothelin |
|-------------|------------------|-------|----------|------------|
| ASC1        | +                | +     | +        | +          |
| ASC2        | +                | +/-   | +/-      | +          |
| ASC3        | N/A <sup>a</sup> | N/A   | N/A      | N/A        |
| ASC4        | +/-              | -     | +/-      | -          |
| ASC5        | +                | +     | +        | +          |
| ASC6        | N/A              | -     | +/-      | N/A        |

+, positive expression; +/-, some positive cells; -, negative expression.

<sup>a</sup> Data non available because of insufficient material.

**Supplementary Table S3. Genes differentially expressed between platinum-sensitive and platinum-resistant PDO.** Positive logFC indicates up-regulation of the gene in the platinum-sensitive condition.

| <b>Gene</b>    | <b>log2FoldChange</b> | <b>pvalue</b> | <b>padj</b> |
|----------------|-----------------------|---------------|-------------|
| <b>RUNX1T1</b> | 3.294                 | 2.15E-08      | 1.53E-05    |
| <b>CCND2</b>   | -6.492                | 2.76E-05      | 9.87E-03    |
| <b>ITGB6</b>   | -4.153                | 5.14E-05      | 0.012       |
| <b>ID1</b>     | -2.002                | 1.73E-04      | 0.031       |
| <b>HDAC5</b>   | -1.237                | 3.34E-04      | 0.041       |
| <b>FN1</b>     | -4.155                | 3.43E-04      | 0.041       |
| <b>KLF4</b>    | -1.558                | 0.001         | 0.062       |
| <b>NPM1</b>    | 1.259                 | 0.001         | 0.064       |
| <b>CDC14B</b>  | -0.959                | 0.001         | 0.064       |
| <b>ITGB3</b>   | -3.783                | 0.002         | 0.121       |
| <b>FST</b>     | -2.738                | 0.002         | 0.121       |
| <b>HOXA9</b>   | -4.624                | 0.002         | 0.121       |
| <b>RELN</b>    | -4.485                | 0.002         | 0.125       |
| <b>INHBB</b>   | -2.347                | 0.003         | 0.126       |
| <b>CDH1</b>    | -0.862                | 0.003         | 0.126       |
| <b>IL20RA</b>  | -2.823                | 0.003         | 0.126       |
| <b>GNGT1</b>   | -2.933                | 0.003         | 0.126       |
| <b>RFC4</b>    | 0.989                 | 0.003         | 0.126       |
| <b>FGFR3</b>   | -3.506                | 0.004         | 0.132       |
| <b>BMP6</b>    | -3.418                | 0.004         | 0.153       |
| <b>GNAQ</b>    | -1.91                 | 0.005         | 0.156       |
| <b>PIK3R3</b>  | -0.857                | 0.005         | 0.156       |
| <b>ZIC2</b>    | -2.844                | 0.005         | 0.156       |
| <b>TET2</b>    | -1.093                | 0.005         | 0.158       |
| <b>SOX9</b>    | -2.467                | 0.006         | 0.162       |
| <b>MAP3K20</b> | -1.039                | 0.006         | 0.162       |
| <b>DUSP4</b>   | -2.799                | 0.008         | 0.201       |
| <b>DKK1</b>    | 1.829                 | 0.008         | 0.202       |
| <b>MRPS5</b>   | -0.456                | 0.008         | 0.202       |
| <b>IL6</b>     | 2.209                 | 0.009         | 0.203       |
| <b>HES5</b>    | 1.364                 | 0.011         | 0.235       |
| <b>POLE2</b>   | 1.319                 | 0.011         | 0.235       |

|                 |        |       |       |
|-----------------|--------|-------|-------|
| <b>WNT7B</b>    | -2.816 | 0.011 | 0.235 |
| <b>CACNA2D1</b> | -1.461 | 0.012 | 0.249 |
| <b>BAMBI</b>    | -1.504 | 0.013 | 0.249 |
| <b>LEF1</b>     | -1.862 | 0.013 | 0.256 |
| <b>SMC1A</b>    | 0.959  | 0.014 | 0.271 |
| <b>MET</b>      | 0.978  | 0.017 | 0.292 |
| <b>SPP1</b>     | -3.203 | 0.016 | 0.292 |
| <b>MLLT3</b>    | -1.406 | 0.017 | 0.292 |
| <b>TMUB2</b>    | -0.918 | 0.017 | 0.292 |
| <b>ERBB2</b>    | -1.351 | 0.018 | 0.295 |
| <b>EZH2</b>     | 0.977  | 0.018 | 0.295 |
| <b>ID2</b>      | -1.362 | 0.02  | 0.313 |
| <b>CHUK</b>     | 0.844  | 0.02  | 0.313 |
| <b>JAK1</b>     | 0.833  | 0.022 | 0.313 |
| <b>PIK3R2</b>   | -0.894 | 0.022 | 0.313 |
| <b>FOSL1</b>    | 1.836  | 0.021 | 0.313 |
| <b>BCL2L1</b>   | -0.929 | 0.021 | 0.313 |
| <b>ERCC2</b>    | -1.385 | 0.023 | 0.317 |
| <b>IL1RAP</b>   | -0.744 | 0.024 | 0.317 |
| <b>IRS1</b>     | -1.961 | 0.023 | 0.317 |
| <b>COL1A1</b>   | -1.678 | 0.04  | 0.332 |
| <b>FANCC</b>    | -0.644 | 0.04  | 0.332 |
| <b>ITGA6</b>    | -1.67  | 0.033 | 0.332 |
| <b>ALKBH2</b>   | 0.883  | 0.037 | 0.332 |
| <b>LEPR</b>     | -1.324 | 0.039 | 0.332 |
| <b>SPOP</b>     | -1.152 | 0.031 | 0.332 |
| <b>APH1B</b>    | -1.173 | 0.028 | 0.332 |
| <b>CDC6</b>     | 1.216  | 0.034 | 0.332 |
| <b>GPC4</b>     | -1.075 | 0.033 | 0.332 |
| <b>CDC25A</b>   | 1.108  | 0.027 | 0.332 |
| <b>COL2A1</b>   | -1.909 | 0.035 | 0.332 |
| <b>RAF1</b>     | 0.646  | 0.035 | 0.332 |
| <b>WNT5A</b>    | -1.633 | 0.039 | 0.332 |
| <b>CDC7</b>     | 0.819  | 0.04  | 0.332 |
| <b>PKMYT1</b>   | 0.913  | 0.039 | 0.332 |
| <b>FANCG</b>    | 1.075  | 0.029 | 0.332 |

|                |        |       |       |
|----------------|--------|-------|-------|
| <b>MAP3K13</b> | -1.233 | 0.028 | 0.332 |
| <b>CDKN2B</b>  | -0.963 | 0.034 | 0.332 |
| <b>E2F1</b>    | 1.04   | 0.038 | 0.332 |
| <b>MECOM</b>   | 1.327  | 0.037 | 0.332 |
| <b>MYCN</b>    | -1.29  | 0.029 | 0.332 |
| <b>SMC3</b>    | 0.664  | 0.036 | 0.332 |
| <b>NOG</b>     | -1.794 | 0.036 | 0.332 |
| <b>LAMC2</b>   | -1.676 | 0.026 | 0.332 |
| <b>FOXO4</b>   | -0.844 | 0.04  | 0.332 |
| <b>PLA2G3</b>  | 1.958  | 0.038 | 0.332 |
| <b>PLA1A</b>   | -2.586 | 0.031 | 0.332 |
| <b>HELLS</b>   | 1.295  | 0.034 | 0.332 |
| <b>HOXA10</b>  | -1.343 | 0.036 | 0.332 |
| <b>FANCE</b>   | 1.003  | 0.032 | 0.332 |
| <b>WNT10A</b>  | -1.791 | 0.027 | 0.332 |
| <b>PRDM1</b>   | -1.977 | 0.037 | 0.332 |
| <b>SFRP2</b>   | 2.256  | 0.041 | 0.335 |
| <b>TGFBR2</b>  | -0.624 | 0.041 | 0.336 |
| <b>UBE2T</b>   | 0.976  | 0.042 | 0.337 |
| <b>MRM2</b>    | 0.838  | 0.044 | 0.346 |
| <b>DLL1</b>    | -0.932 | 0.044 | 0.348 |
| <b>LAT</b>     | -1.617 | 0.047 | 0.349 |
| <b>CHEK1</b>   | 1.262  | 0.047 | 0.349 |
| <b>SETBP1</b>  | -1.364 | 0.046 | 0.349 |
| <b>NOTCH2</b>  | -0.631 | 0.046 | 0.349 |
| <b>EGFR</b>    | -0.828 | 0.045 | 0.349 |
| <b>ERCC3</b>   | 0.744  | 0.049 | 0.364 |

**Supplementary Table S4. Antibodies (Immunofluorescence)**

| Reagent                                                      | Supplier                 |
|--------------------------------------------------------------|--------------------------|
| PAX8 Rabbit Polyclonal Antibody                              | ProteinTech (20336-1-AP) |
| Vimentin (D21H3) XP® Rabbit mAb (Alexa Fluor® 647 Conjugate) | Cell Signaling (9856)    |
| EpCAM (VU1D9) Mouse mAb (Alexa Fluor® 594 Conjugate)         | Cell Signaling (7319)    |
| Mesothelin Polyclonal Antibody                               | Invitrogen (PA5-21662)   |
| Ki-67 (D3B5) Rabbit mAb (Alexa Fluor® 488 Conjugate)         | Cell Signaling (11882)   |
| Anti-Hu CD45 Alexa Fluor® 647                                | Exbio (A6-222-T025)      |
| Goat Anti-Rabbit IgG H&L (Alexa Fluor® 488)                  | Abcam (ab150077)         |
| NucBlue™ Live ReadyProbes™ Reagent (Hoechst 33342)           | Invitrogen (R37605)      |
| Cleaved Caspase-3 (Asp175) Antibody                          | Cell Signaling (9661)    |

## **SUPPLEMENTARY MATERIALS AND METHODS**

### **Immunofluorescence analysis of Cleaved Caspase-3 Antibody**

Organoids were grown in BME/SOM domes (30 $\mu$ L) on an eight-chamber slide (Ibidi). 500 $\mu$ L of 10 $\mu$ M carboplatin, diluted in SOM without Y27632, was added to four wells, and 500 $\mu$ L of SOM without Y27632 was added to the other four wells (as negative controls for the drug). The slide was incubated for 24 hours. Next, the media was removed and the PDOs were fixed in 4% paraformaldehyde for 1 hour. They were permeabilized with permeabilization buffer (PBS, 1% triton X-100) for 1 hour and blocked with blocking buffer (PBS, 1% BSA, 3% fetal bovine serum, 0.2% triton) for 1 hour. Then, they were incubated with the primary antibody (Cleaved Caspase-3 Antibody) diluted in the working buffer (PBS, 0.1% BSA, 0.3% fetal bovine serum, 0.2% triton X-100) overnight at room temperature in the dark. After several washes with the working buffer, the wells incubated with Cleaved Caspase-3 previously were incubated this time with the secondary antibody (Goat Anti-Rabbit IgG H&L Alexa Fluor® 488) for 1 hour. The working buffer was discarded, and the removable part of the chamber was taken off. Finally, a few droplets of Aqua-Poly/Mount (18606-100, Polysciences) were added and a cover glass was placed on top. Confocal microscopy pictures were taken (oil, 40x), and images were processed with ImageJ software.

### **Immunofluorescence analysis of EpCAM and CD45**

Organoids were grown in BME on eight-chamber slides (Ibidi). The media was removed and the PDOs were fixed in 4% paraformaldehyde for 1 hour. They were permeabilized with permeabilization buffer (PBS, 1% triton X-100) for 1 hour and blocked with blocking buffer (PBS, 1% BSA, 3% fetal bovine serum, 0.2% triton) for 1 hour. Then, they were incubated with the primary antibodies (Anti-Hu CD45 Alexa Fluor® 647 and EpCAM Mouse mAb Alexa Fluor® 594 Conjugate) diluted in the working buffer (PBS, 0.1% BSA, 0.3% fetal bovine serum, 0.2% triton X-100) overnight at room temperature in the dark. After several washes with the working buffer, we discarded it and the removable part of the chamber was taken off. Finally, a few droplets of Aqua-Poly/Mount (18606-100, Polysciences) were added and a cover glass was placed on top. Confocal microscopy pictures were taken (oil, 40x), and images were processed with ImageJ software.

## SUPPLEMENTARY FIGURES

**Supplementary Figure S1. Establishment of patient-derived organoids from ascites of GSC patients.** Representative bright-field images of the different PDOs from ASC4, ASC5, ASC6 are shown. Scale bars, 100  $\mu$ m.

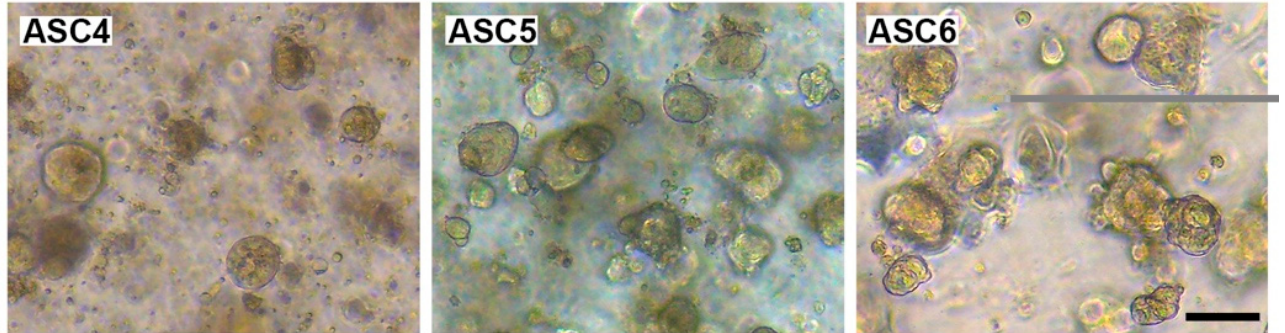

**Supplementary Figure S2. Immunohistochemistry profiling of the ASC5 PDOs.** The panels show representative ASC5 organoids stained with different markers of gynaecological serous carcinomas: H&E, P53, CK7, WT-1, ER, PR and PAX8, as described in the M&M section. Abundant nuclear atypia is shown in the PDOs. Scale bars, 100  $\mu$ m.

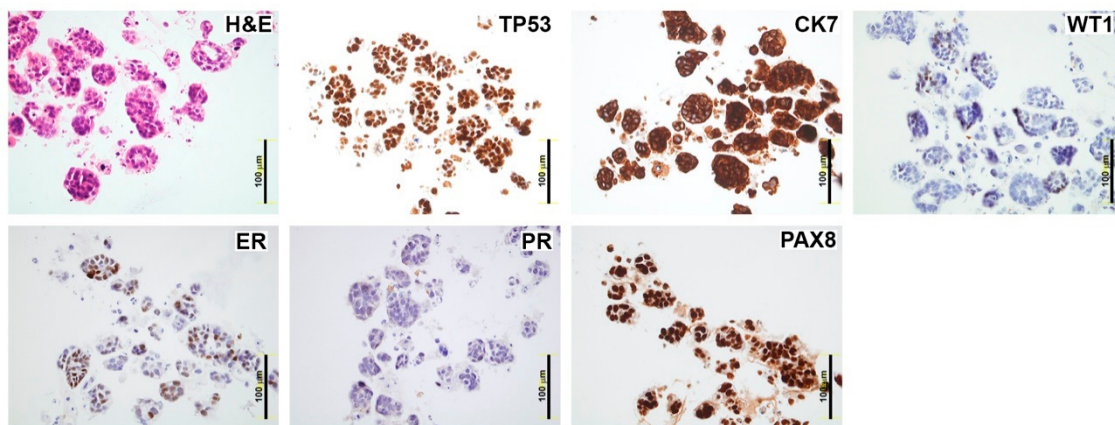

**Supplementary Figure S3. Immunofluorescence characterisation of the PDOs.**

Representative confocal microscopy images of PDOs (ASC1, ASC5, ASC4) derived from the ascitic fluid of GSC patients, labelled with the GSC clinical markers PAX8 (nuclear) and EpCAM (membrane). Left panels show PDOs stained with PAX8, middle panels show the staining with the epithelial marker EpCAM, and the nuclear staining with DAPI; right panels are merged images. Scale bar, 100  $\mu$ m.

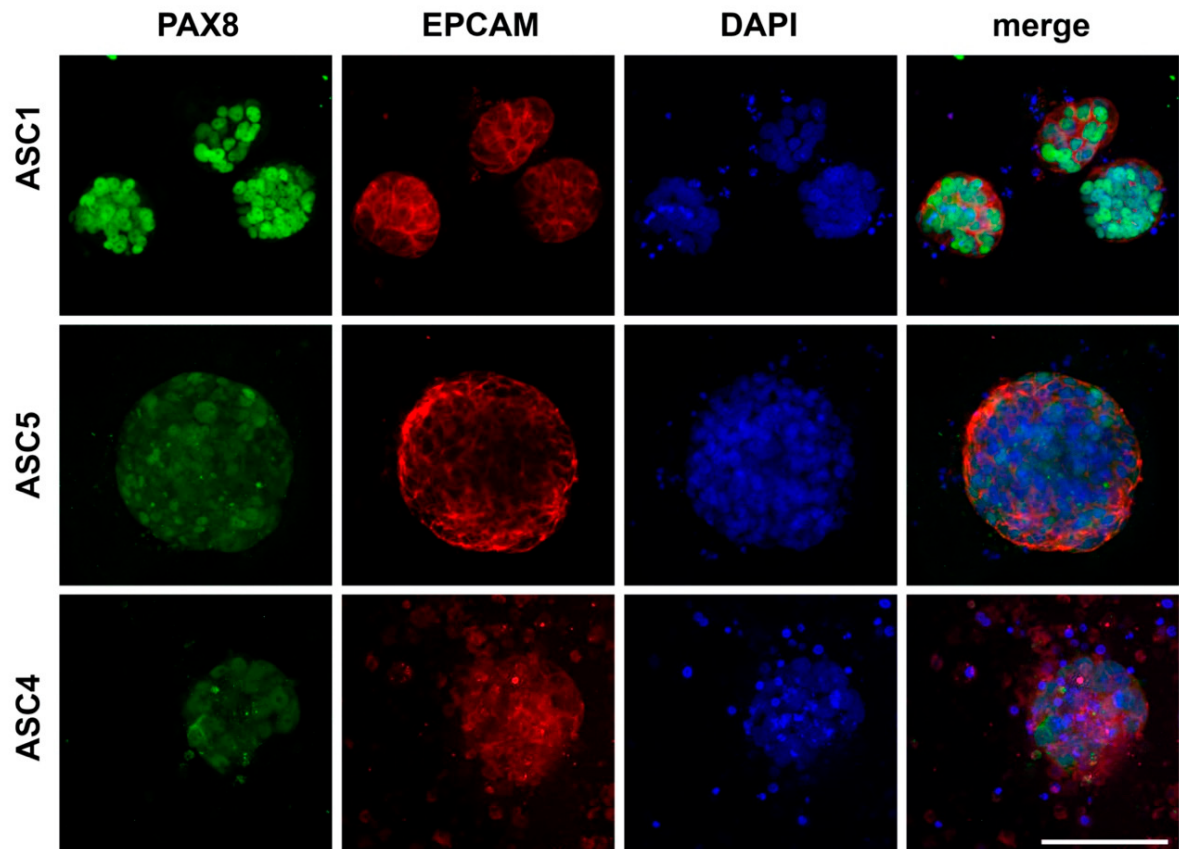

**Supplementary Figure S4. Immunofluorescence characterisation of the immune-related component with CD45 in the PDOs.** Representative confocal microscopy images of PDOs (ASC2, ASC1, ASC4, ASC5) derived from the ascitic fluid of GSC patients. Left panels show PDOs stained with GSC clinical marker EpCAM, middle panels show the staining with CD45 (1:200), right panels show nuclear staining with DAPI. CD45 staining showed residual presence of cells of immune and haematological origin, indicative of the purity and homogeneity of the tumoral component. Scale bar, 100  $\mu$ m.

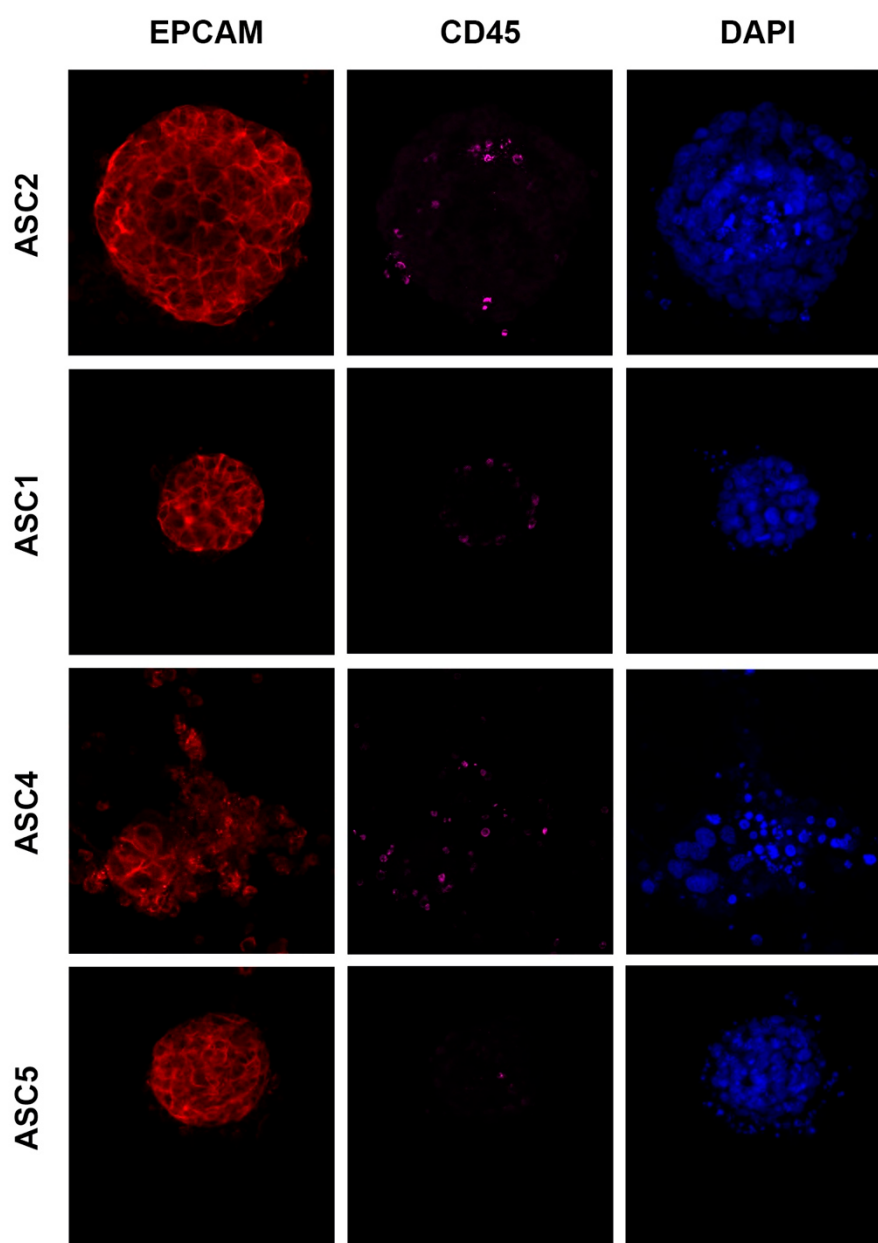

**Supplementary Figure S5. Design of the drug sensitivity assays.** In order to design the protocol for the drug sensitivity assays, we initially tested different concentrations of carboplatin, selected based on existing literature [10, 38]. As stated, the maximum plasma concentration of carboplatin is 135  $\mu\text{M}$ , so we aimed to choose concentrations covering this range to observe the full spectrum of response, from no response to complete cell death (500 $\mu\text{M}$ ). Representative bright-field microscopic images of treated ASC4 PDOs and the observed effects are also included.

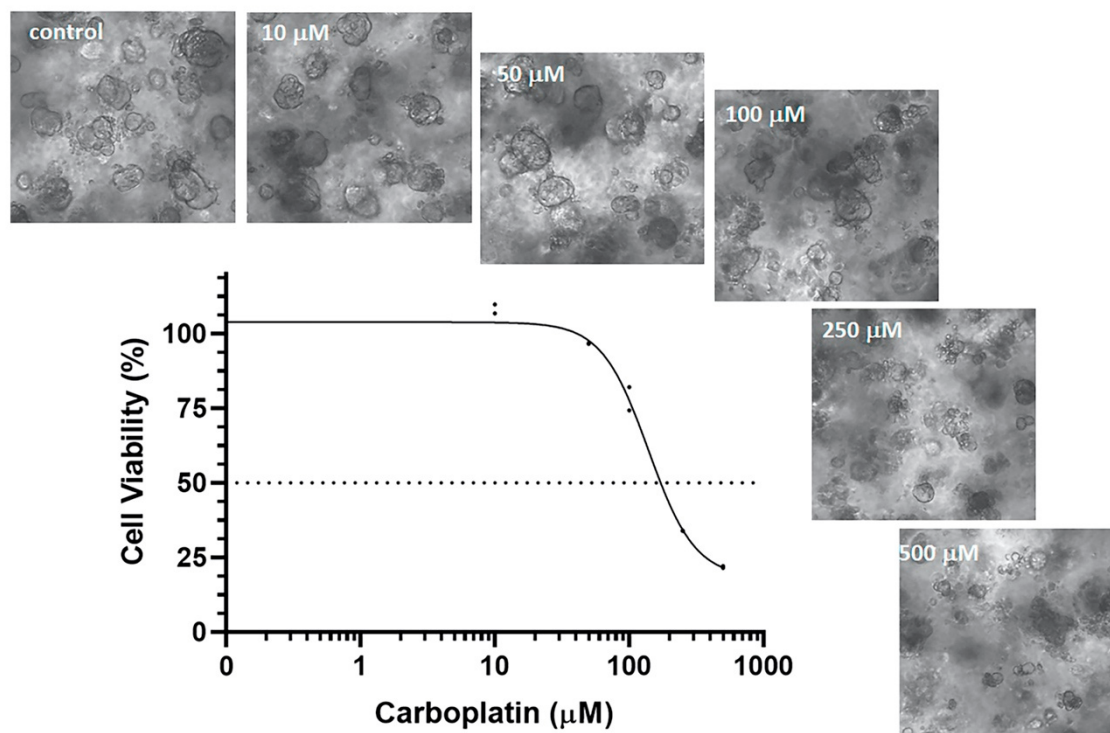

**Supplementary Figure S6. Immunofluorescence analysis of Cleaved Caspase-3 in**

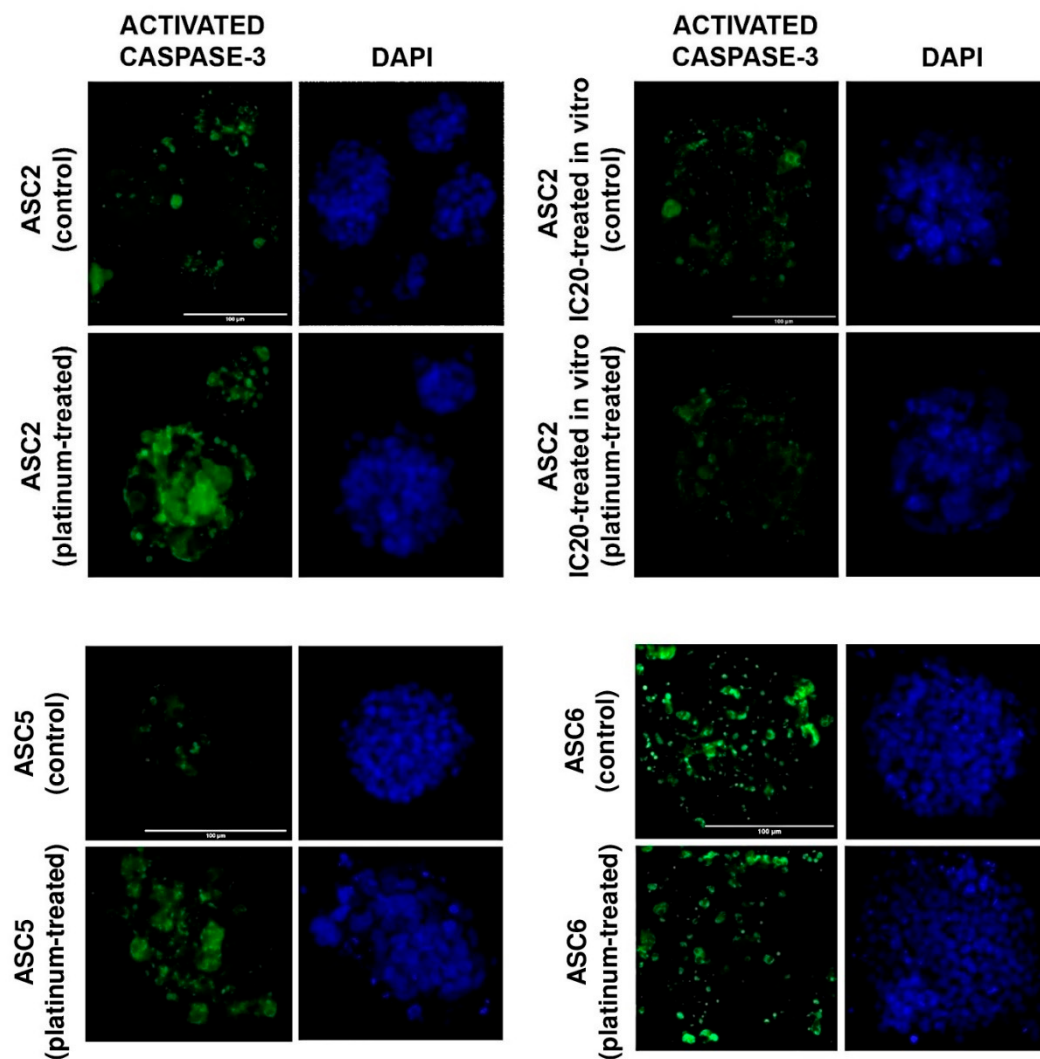

**Supplementary Figure S7. Negative control for the immunofluorescence staining.**

The left panel show no positivity in the organoids incubated with the secondary antibody (Goat Anti-Rabbit IgG H&L Alexa Fluor® 488) but without the primary antibody, demonstrating specificity for immunofluorescence staining. The right panel show nuclear staining with DAPI. Scale bars, 100  $\mu$ m.

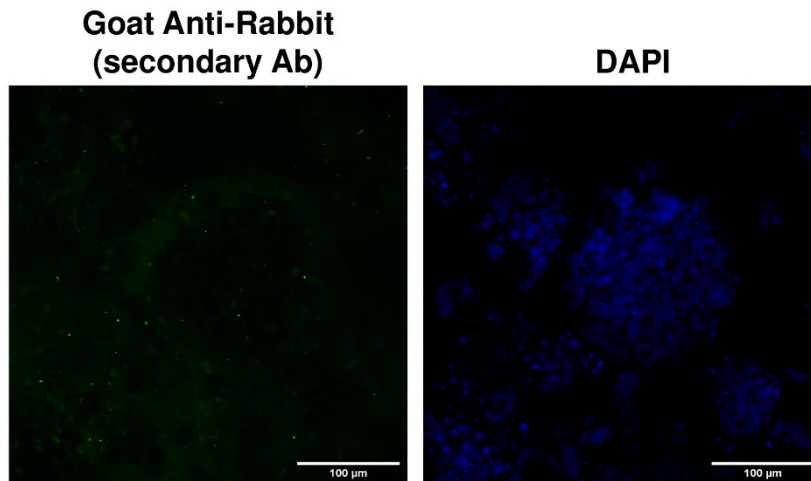

Supplement: Supplementary file 1 [file ijms-24-13208-s001.zip › ijms-2427961-supplementary.pdf]
